# Supplementary material for: An economical fluorescent method for microplastic detection in soil samples
Source: Royal Society of Chemistry journal article supplement (doi:10.1039/d4ay01893a), 2025-01-01
Supplement: d4ay01893a2.xlsx [file d4ay01893a2.xlsx]

## Sheet: Sheet1
Column1	Garden Soil	Argricultural Soil	State Park Soil	Lakeshore Sediment
Experiment 1	0	3	0	19
Experiment 2	3	7	1	11
Experiment 3	3	0	0	16
Total	6	10	1	46
